# Supplementary material
Source: PubMed Central journal article supplement (PMC3507372)
Supplement: ASN.2012070664_ASN2012070664SupplementaryData.pdf [file ASN.2012070664_ASN2012070664SupplementaryData.pdf]

**Supplementary table 1a.** Relative risk, confidence intervals relative weight, and tests of heterogeneity for the pooled analysis for graft failure rates for group 1 and group 2

|                          | Relative Risk | 95% Confidence interval | Weight %     | z            | p value          | I <sup>2</sup> statistic | p value      |
|--------------------------|---------------|-------------------------|--------------|--------------|------------------|--------------------------|--------------|
| <b>Group 1</b>           |               |                         |              |              |                  |                          |              |
| Patel <sup>5</sup>       | 6.833         | 0.81 - 57.652           | 1.68         |              |                  |                          |              |
| Gupta <sup>3</sup>       | 0.904         | 0.354 - 2.308           | 17.26        |              |                  |                          |              |
| Vlad <sup>7</sup>        | 4.705         | 1.456 -15.202           | 2.74         |              |                  |                          |              |
| Willicombe <sup>8</sup>  | 2.62          | 1.456 -4.718            | 18.55        |              |                  |                          |              |
| Verghese <sup>6</sup>    | 1.667         | 0.401 -6.935            | 4.74         |              |                  |                          |              |
| Higgins <sup>4</sup>     | 1.515         | 0.654 -3.512            | 15.42        |              |                  |                          |              |
| <b>Group 1 pooled RR</b> | <b>1.984</b>  | <b>1.364 - 2.885</b>    | <b>60.39</b> | <b>3.58</b>  | <b>&lt;0.001</b> | <b>32.3%</b>             | <b>0.193</b> |
| <b>Group 2</b>           |               |                         |              |              |                  |                          |              |
| Aubert <sup>12</sup>     | 23.769        | 1.02 - 553.677          | 0.25         |              |                  |                          |              |
| Amico <sup>11</sup>      | 5.943         | 3.504 - 10.083          | 20.69        |              |                  |                          |              |
| Lefaucher <sup>15</sup>  | 13.28         | 5.585 - 31.578          | 6.31         |              |                  |                          |              |
| Dunn                     | 3.673         | 1.947 – 6.931           | 12.39        |              |                  |                          |              |
| <b>Group 2 pooled RR</b> | <b>7.808</b>  | <b>5.029 - 12.122</b>   | <b>39.61</b> | <b>10.12</b> | <b>&lt;0.001</b> | <b>53.8</b>              | <b>0.090</b> |
| <b>Overall pooled RR</b> | <b>3.780</b>  | <b>2.943 – 4.853</b>    | <b>100</b>   | <b>10.42</b> | <b>&lt;0.001</b> | <b>68.9%</b>             | <b>0.001</b> |

**Supplementary table 1b.** Relative risk, confidence intervals relative weight, and tests of heterogeneity for the pooled analysis for graft failure rates for group 1 and group 2

|                                   | Relative Risk | 95% Confidence interval | Weight %     | z           | p value          | I <sup>2</sup> statistic | p value      |
|-----------------------------------|---------------|-------------------------|--------------|-------------|------------------|--------------------------|--------------|
| <b>Group 1</b>                    |               |                         |              |             |                  |                          |              |
| Patel <sup>8</sup>                | 1.952         | 0.81 - 57.652           | 0.89         |             |                  |                          |              |
| Gupta <sup>6</sup>                | 0.904         | 0.354 - 2.308           | 10.03        |             |                  |                          |              |
| Vlad <sup>10</sup>                | 1.901         | 1.456 -15.202           | 3.95         |             |                  |                          |              |
| Willicombe <sup>11</sup>          | 2.165         | 1.456 -4.718            | 6.58         |             |                  |                          |              |
| Verghese <sup>9</sup>             | 3.333         | 0.401 -6.935            | 3.33         |             |                  |                          |              |
| Higgins <sup>7</sup>              | 1.731         | 0.654 -3.512            | 2.45         |             |                  |                          |              |
| Couzi <sup>5</sup>                | (Excluded)    |                         |              |             |                  |                          |              |
| <b>Group 1 pooled RR</b>          | <b>1.759</b>  | <b>1.128 - 2.743</b>    | <b>27.23</b> | <b>2.49</b> | <b>0.013</b>     | <b>0%</b>                | <b>0.570</b> |
| <b>Group 2</b>                    |               |                         |              |             |                  |                          |              |
| Gibney <sup>15</sup>              | 3.7           | 0.778 - 17.596          | 2.13         |             |                  |                          |              |
| Van den Berg-Loonen <sup>18</sup> | 1.067         | 0.171 - 6.643           | 2.55         |             |                  |                          |              |
| Aubert <sup>13</sup>              | 2.889         | 0.124 - 67.034          | 0.41         |             |                  |                          |              |
| Amico <sup>12</sup>               | 1.968         | 1.124 - 3.444           | 16.75        |             |                  |                          |              |
| Caro-Orleas <sup>14</sup>         | 1.595         | 1.142 - 2.226           | 47.55        |             |                  |                          |              |
| <b>Dunn</b>                       | <b>0.360</b>  | <b>0.022 – 5.903</b>    | <b>3.38</b>  |             |                  |                          |              |
| <b>Group 2 pooled RR</b>          | <b>1.673</b>  | <b>1.270 – 2.205</b>    | <b>72.77</b> | <b>3.65</b> | <b>&lt;0.001</b> | <b>0%</b>                | <b>0.715</b> |
| <b>Overall pooled RR</b>          | <b>1.697</b>  | <b>1.342 – 2.145</b>    | <b>100</b>   | <b>4.42</b> | <b>&lt;0.001</b> | <b>0%</b>                | <b>0.810</b> |

**Supplemental Figure 1a.** Forest plot for risk of antibody mediated rejection with and without DSA stratified by flow crossmatch results for group 3 and group 4

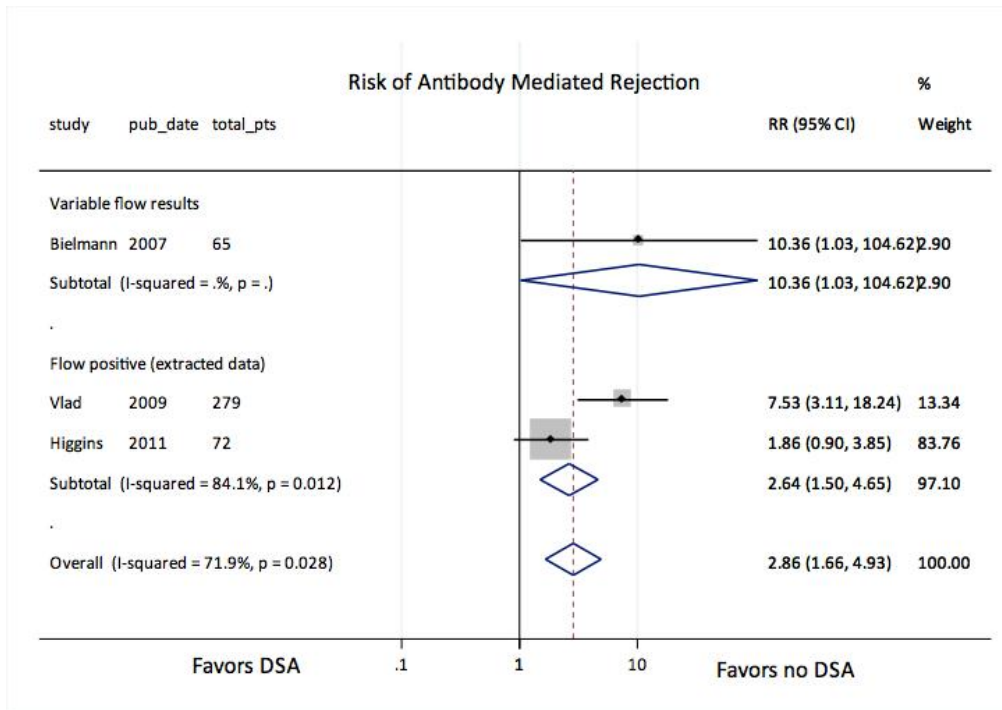

**Supplemental Figure 1b.** Forest plot for risk of graft failure with and without DSA stratified by flow crossmatch results for group 3 and group 4

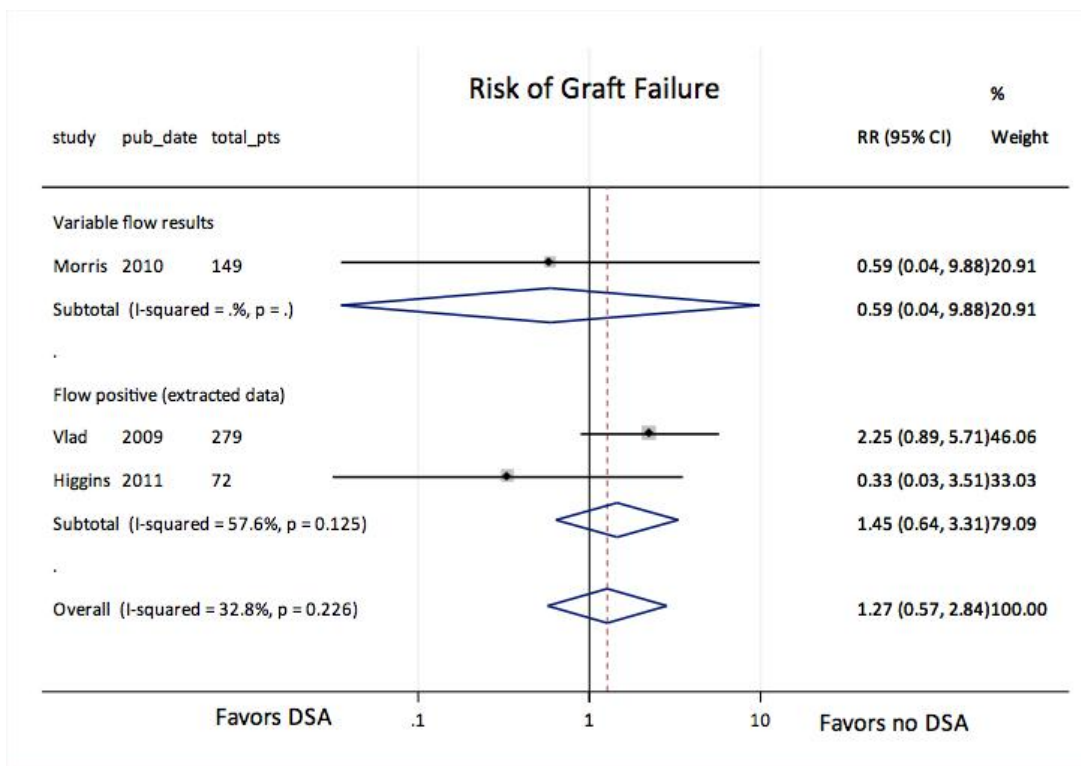

**Supplementary Table 2a.** Relative risk, confidence intervals relative weight, and tests of heterogeneity for the pooled analysis for AMR for groups 3 and 4

|                          | Relative Risk | 95% Confidence interval | Weight %    | z           | p value          | I <sup>2</sup> statistic | p value      |
|--------------------------|---------------|-------------------------|-------------|-------------|------------------|--------------------------|--------------|
| <b>Group 3</b>           |               |                         |             |             |                  |                          |              |
| Bielmann <sup>25</sup>   | 10.364        | 1.027 – 104.622         | 2.62        |             |                  |                          |              |
| <b>Group 3 pooled RR</b> | <b>10.364</b> | <b>1.027 – 104.622</b>  | <b>2.62</b> | <b>1.98</b> | <b>0.047</b>     | -                        | -            |
| <b>Group 4</b>           |               |                         |             |             |                  |                          |              |
| Vlad <sup>10</sup>       | 7.527         | 3.106 – 18.241          | 13.34       |             |                  |                          |              |
| Higgins <sup>7</sup>     | 1.857         | 0.896 – 3.851           | 83.76       |             |                  |                          |              |
| <b>Group 4 pooled RR</b> | <b>2.636</b>  | <b>1.496 – 4.646</b>    | <b>97.1</b> | <b>3.35</b> | <b>0.001</b>     | <b>84.1</b>              | <b>0.012</b> |
| <b>Overall pooled RR</b> | <b>7.875</b>  | <b>5.111 – 12.132</b>   | <b>100</b>  | <b>3.79</b> | <b>&lt;0.001</b> | <b>71.9%</b>             | <b>0.028</b> |

**Supplementary Table 2b.** Relative risk, confidence intervals relative weight, and tests of heterogeneity for the pooled analysis for graft failure rates for groups 3 and 4

|                          | Relative Risk | 95% Confidence interval | Weight %     | z           | p value      | I <sup>2</sup> statistic | p value      |
|--------------------------|---------------|-------------------------|--------------|-------------|--------------|--------------------------|--------------|
| <b>Group 3</b>           |               |                         |              |             |              |                          |              |
| Morris <sup>27</sup>     | 0.592         | 0.035 – 9.883           | 20.91        |             |              |                          |              |
| <b>Group 3 pooled RR</b> | <b>0.592</b>  | <b>0.035 – 9.883</b>    | <b>20.91</b> | <b>0.37</b> | <b>0.715</b> | -                        | -            |
| <b>Group 4</b>           |               |                         |              |             |              |                          |              |
| Vlad <sup>10</sup>       | 2.253         | 0.888 – 5.714           | 46.06        |             |              |                          |              |
| Higgins <sup>7</sup>     | 0.333         | 0.032 – 3.515           | 33.03        |             |              |                          |              |
| <b>Group 4 pooled RR</b> | <b>1.451</b>  | <b>0.637 – 3.307</b>    | <b>79.09</b> | <b>0.89</b> | <b>0.376</b> | <b>57.6%</b>             | <b>0.125</b> |
| <b>Overall pooled RR</b> | <b>1.271</b>  | <b>0.569 – 2.840</b>    | <b>100</b>   | <b>0.53</b> | <b>0.558</b> | <b>32.8%</b>             | <b>0.226</b> |

**Supplementary table 3. Definitions used for a negative flow crossmatch across studies included in group 1.**

| Study                    | Criteria listed                                                                                                                                                                                                                                                             |
|--------------------------|-----------------------------------------------------------------------------------------------------------------------------------------------------------------------------------------------------------------------------------------------------------------------------|
| Patel <sup>8</sup>       | T cell FCXMs were considered borderline positive if MCS was +40 or greater and positive if the MCS was + 80 or greater. B cell FCXMs were considered borderline positive if MCS was + 100 or greater and positive if MCS was + 200 or greater                               |
| Gupta <sup>6</sup>       | No details provided other than that both T and B cell crossmatch was performed                                                                                                                                                                                              |
| Vlad <sup>10</sup>       | A positive T cell FCXM and a positive B cell FCXM represented median channel shift values of $\geq 40$ and $\geq 100$ , respectively."                                                                                                                                      |
| Couzi <sup>5</sup>       | Threshold for positivity set for MFI ratio between the patient's serum and the negative control serum of 1.2 for T cells and 2 for B cells, which were equivalent to a shift of 20 and 70 fluorescence channels, respectively                                               |
| Willicombe <sup>11</sup> | Performed only T cell flow crossmatch. No further details provided                                                                                                                                                                                                          |
| Vergheze <sup>9</sup>    | No details provided                                                                                                                                                                                                                                                         |
| Higgins <sup>7</sup>     | Readout was the ratio of the median channel Fluorescence of the test sample over that for the negative control AB serum as relative median Fluorescence. Threshold for a positive XM was set at a relative median fluorescence of 4 for primary grafts and 2.5 for regrafts |
